# Supplementary material
Source: PubMed Central journal article supplement (PMC7041614)

**Figure S1. CONSORT flow diagram**

CBT/SC, cognitive behavioral therapy plus standard care; ED/SC, education plus standard care.

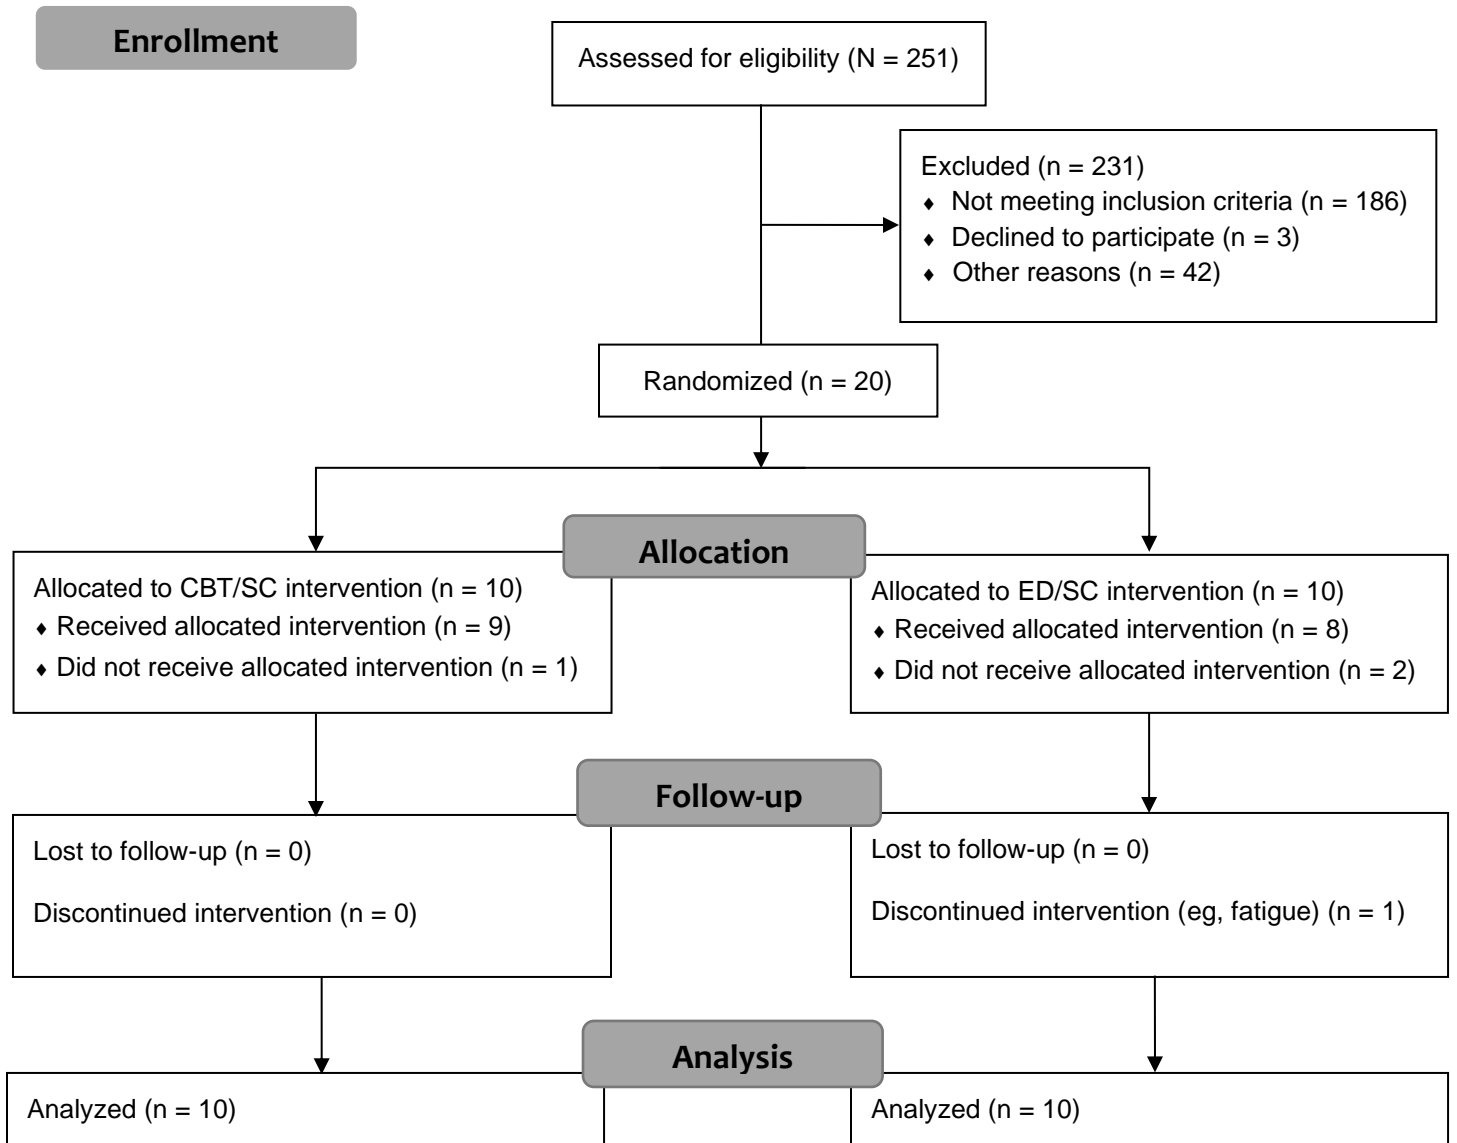

Supplement: i1537-2073-22-1-8_s01.pdf [file i1537-2073-22-1-8_s01.pdf]
